# Supplementary material for: Evidence for contrasting roles of dimethylsulfoniopropionate production in Emiliania huxleyi and Thalassiosira oceanica
Source: PubMed Central journal article supplement (PMC7154784; doi:10.1111/nph.16374), 2020-01-27
Supplement: NPH-226-396-s001.pdf [file NPH-226-396-s001.pdf]

1 Supporting Information

2 Article title: Evidence for contrasting roles of dimethylsulfoniopropionate (DMSP) production in  
3 *Emiliania huxleyi* and *Thalassiosira oceanica*

4  
5 Authors: Erin L. McParland, Anna Wright, Kristin Art, Meagan He and Naomi M. Levine

6  
7 Article acceptance date: 27 November 2019

8  
9 The following Supporting Information is available for this article:

10 Notes **S1**: Description of the mid-day  $F_v/F_m$  diel feature in *E. huxleyi* and *T. oceanica*.

11 Table **S1**: Number of cellular biovolumes measurements made for *E. huxleyi* and *T. oceanica* for  
12 all experiments.

13 Table **S2**: Assumptions and parameters used to predict the percent contribution of intracellular  
14 DMSP to total organic osmolarity.

15 Fig. **S1**: Thermal response curve of *E. huxleyi* and *T. oceanica*.

16 Fig. **S2**:  $F_v/F_m$  measured in *E. huxleyi* and *T. oceanica* steady-state temperature stress,  $\text{NO}_3^-$   
17 limitation and salinity stress experiments.

18 Fig. **S3**: Intracellular DMSP measured in *E. huxleyi* and *T. oceanica* steady-state temperature  
19 stress,  $\text{NO}_3^-$  limitation and salinity stress experiments.

20 Fig. **S4**:  $F_v/F_m$  measured in *T. oceanica* grown at a range of steady-state  $\text{NO}_3^-$  concentrations.

21 Fig. **S5**:  $F_v/F_m$  diel cycle for *E. huxleyi* and *T. oceanica* in steady- and non-steady-state  $\text{NO}_3^-$   
22 limitation.

23 Fig. **S6**: DMSPt measured in non-steady-state *E. huxleyi* and *T. oceanica* after  $\text{NO}_3^-$  add-back.

24 Fig. **S7**: Dilution of intracellular DMSP in *T. oceanica* after  $\text{NO}_3^-$  add-back due to cell division.

32 Supporting Information Notes

33 Notes **S1**: During the non-steady-state NO<sub>3</sub><sup>-</sup> add-back experiment, +N *E. huxleyi* and +N and -N  
34 *T. oceanica* exhibited a mid-day F<sub>v</sub>/F<sub>m</sub> minimum that was significantly lower than F<sub>v</sub>/F<sub>m</sub> at the  
35 beginning of the experiment (p≤0.05) (Main text, Fig. **3**). We tested the reproducibility of this  
36 feature by repeating the F<sub>v</sub>/F<sub>m</sub> measurements in non-steady-state and also steady-state NO<sub>3</sub><sup>-</sup>  
37 replete and NO<sub>3</sub><sup>-</sup> limited conditions. The F<sub>v</sub>/F<sub>m</sub> diel feature was reproducible in non-steady-state  
38 for both *E. huxleyi* and *T. oceanica* (Fig. **S5**). However, the mid-day minimum was absent in *E.*  
39 *huxleyi* under all steady-state NO<sub>3</sub><sup>-</sup> conditions (Fig. **S5a**), but still present in *T. oceanica* under all  
40 steady-state NO<sub>3</sub><sup>-</sup> conditions (Fig. **S5b**). Therefore, the mid-day minimum in F<sub>v</sub>/F<sub>m</sub> may reflect a  
41 response to the non-steady-state NO<sub>3</sub><sup>-</sup> add-back only in *E. huxleyi*. In contrast, the mid-day  
42 minimum in *T. oceanica* F<sub>v</sub>/F<sub>m</sub> is likely an inherent component of the species' PSII reaction  
43 centers, independent of nutrient status and similar to that observed previously in natural  
44 communities of diatoms and picoplankton (Villareal 2004; Mackey et al. 2008).

45  
46  
47  
48  
49  
50  
51  
52  
53  
54  
55  
56  
57  
58  
59  
60  
61  
62

63 Supporting Information Tables

64 Table S1: The number of measurements of cell diameter and height made to calculate cellular  
 65 biovolumes of *T. oceanica* and *E. huxleyi*. Cellular biovolumes did not significantly change  
 66 across treatments in any of the experiments ( $p>0.1$ ) and therefore the mean cellular biovolume of  
 67 each species was used to calculate intracellular DMSP for all experimental treatments  
 68 (experiments 1-4). Error bars represent  $\pm$  SD.

|                  |                | <i>E. huxleyi</i> |                               |       | <i>T. oceanica</i> |                               |       |    |
|------------------|----------------|-------------------|-------------------------------|-------|--------------------|-------------------------------|-------|----|
|                  |                | No. counts        | Biovolume ( $\mu\text{m}^3$ ) | $\pm$ | No. counts         | Biovolume ( $\mu\text{m}^3$ ) | $\pm$ |    |
| Steady-state     |                |                   |                               |       |                    |                               |       |    |
|                  | N rep          | 69                | 54                            | 15    | 36                 | 119                           | 36    |    |
|                  | N lim          | 71                | 53                            | 10    | 50                 | 136                           | 9     |    |
|                  | 14°C           | 43                | 58                            | 18    | 33                 | 128                           | 36    |    |
|                  | 16°C           | 58                | 63                            | 15    | 55                 | 113                           | 35    |    |
|                  | 20°C           | 57                | 69                            | 12    | 33                 | 140                           | 36    |    |
|                  | 23°C           | 82                | 63                            | 19    | 51                 | 106                           | 22    |    |
|                  | 26°C           | 20                | 63                            | 19    | 18                 | 120                           | 20    |    |
|                  | 28°C           | 21                | 63                            | 19    | 19                 | 120                           | 20    |    |
| Non-steady-state |                |                   |                               |       |                    |                               |       |    |
|                  | Timepoint (hr) |                   |                               |       |                    |                               |       |    |
|                  | -N             | 0                 | 21                            | 60    | 14                 | 32                            | 104   | 17 |
|                  | -N             | 1                 | 73                            | 54    | 10                 | 131                           | 150   | 30 |
|                  | -N             | 3                 | 159                           | 54    | 10                 | 172                           | 132   | 33 |
|                  | -N             | 6                 | 149                           | 41    | 9                  | 180                           | 116   | 30 |
|                  | -N             | 9                 | 107                           | 52    | 10                 | 114                           | 140   | 33 |
|                  | -N             | 12                | 100                           | 41    | 9                  | 178                           | 125   | 30 |
|                  | +N             | 24                | 120                           | 52    | 10                 | 98                            | 140   | 35 |
|                  | +N             | 1                 | 78                            | 55    | 13                 | 110                           | 127   | 22 |
|                  | +N             | 3                 | 87                            | 65    | 16                 | 239                           | 134   | 33 |
|                  | +N             | 6                 | 115                           | 55    | 13                 | 223                           | 144   | 36 |
|                  | +N             | 9                 | 120                           | 65    | 16                 | 160                           | 156   | 36 |
|                  | +N             | 12                | 76                            | 52    | 14                 | 150                           | 131   | 33 |
|                  | +N             | 24                | 119                           | 49    | 13                 | 175                           | 121   | 29 |

69  
70  
71  
72  
73  
74  
75  
76  
77  
78  
79

80 Table S2: The following parameters were used to predict the percent contribution of intracellular  
 81 DMSP to total organic osmolarity in each steady-state experiment.

|                                         | Treatment            | Media Osmolarity<br>(osmol · m <sup>-3</sup> ) | Cellular osmolarity<br>(osmol · m <sup>-3</sup> ) | Na+<br>(mM) | K+<br>(mM) | Cl-<br>(mM) | Ionic osmolarity<br>(osmol · m <sup>-3</sup> ) | % inorganic osmolarity | Organic osmolarity needed<br>(osmol · m <sup>-3</sup> ) | % DMSP contribution to org osmolarity |
|-----------------------------------------|----------------------|------------------------------------------------|---------------------------------------------------|-------------|------------|-------------|------------------------------------------------|------------------------|---------------------------------------------------------|---------------------------------------|
| <i>E. huxleyi</i>                       |                      |                                                |                                                   |             |            |             |                                                |                        |                                                         |                                       |
| Salinity (‰)                            | 45                   | 1266                                           | 1520                                              | 396         | 138        | 625         | 1159                                           | 76%                    | 361                                                     | 37%                                   |
|                                         | 40                   | 1124                                           | 1349                                              | 352         | 122        | 555         | 1029                                           | 76%                    | 320                                                     | 25%                                   |
|                                         | 35                   | 988                                            | 1185                                              | 309         | 107        | 488         | 904                                            | 76%                    | 281                                                     | 20%                                   |
|                                         | 30                   | 844                                            | 1013                                              | 264         | 92         | 417         | 772                                            | 76%                    | 240                                                     | 21%                                   |
|                                         | 25                   | 702                                            | 842                                               | 220         | 76         | 347         | 642                                            | 76%                    | 200                                                     | 24%                                   |
| Temp (°C)                               | 14                   | 1013                                           | 1216                                              | 317         | 110        | 500         | 927                                            | 76%                    | 289                                                     | 112%                                  |
|                                         | 16                   | 1013                                           | 1216                                              | 317         | 110        | 500         | 927                                            | 76%                    | 289                                                     | 106%                                  |
|                                         | 20                   | 1013                                           | 1216                                              | 317         | 110        | 500         | 927                                            | 76%                    | 289                                                     | 69%                                   |
|                                         | 23                   | 1013                                           | 1216                                              | 317         | 110        | 500         | 927                                            | 76%                    | 289                                                     | 50%                                   |
|                                         | 26                   | 1013                                           | 1216                                              | 317         | 110        | 500         | 927                                            | 76%                    | 289                                                     | 23%                                   |
|                                         | 28                   | 1013                                           | 1216                                              | 317         | 110        | 500         | 927                                            | 76%                    | 289                                                     | 41%                                   |
| NO <sub>3</sub> <sup>-</sup> limitation | replete              | 1013                                           | 1216                                              | 317         | 110        | 500         | 927                                            | 76%                    | 289                                                     | 57%                                   |
|                                         | mid-exponential lim  | 1013                                           | 1216                                              | 317         | 110        | 500         | 927                                            | 76%                    | 289                                                     | 46%                                   |
|                                         | late-exponential lim | 1013                                           | 1216                                              | 317         | 110        | 500         | 927                                            | 76%                    | 289                                                     | 50%                                   |
| <i>T. oceanica</i>                      |                      |                                                |                                                   |             |            |             |                                                |                        |                                                         |                                       |
| Salinity (‰)                            | 50                   | 1408                                           | 1690                                              | 445         | 6          | 595         | 1045                                           | 62%                    | 644                                                     | 2.13%                                 |
|                                         | 40                   | 1124                                           | 1349                                              | 355         | 4          | 475         | 835                                            | 62%                    | 515                                                     | 0.69%                                 |
|                                         | 35                   | 988                                            | 1185                                              | 312         | 4          | 417         | 733                                            | 62%                    | 452                                                     | 0.19%                                 |
|                                         | 25                   | 702                                            | 842                                               | 222         | 3          | 297         | 521                                            | 62%                    | 321                                                     | 0.16%                                 |
| Temp (°C)                               | 14                   | 1013                                           | 1216                                              | 320         | 4          | 428         | 752                                            | 62%                    | 464                                                     | 2.2%                                  |
|                                         | 16                   | 1013                                           | 1216                                              | 320         | 4          | 428         | 752                                            | 62%                    | 464                                                     | 1.9%                                  |
|                                         | 20                   | 1013                                           | 1216                                              | 320         | 4          | 428         | 752                                            | 62%                    | 464                                                     | 1.8%                                  |
|                                         | 23                   | 1013                                           | 1216                                              | 320         | 4          | 428         | 752                                            | 62%                    | 464                                                     | 1.4%                                  |
|                                         | 26                   | 1013                                           | 1216                                              | 320         | 4          | 428         | 752                                            | 62%                    | 464                                                     | 0.4%                                  |
|                                         | 28                   | 1013                                           | 1216                                              | 320         | 4          | 428         | 752                                            | 62%                    | 464                                                     | 0.4%                                  |
| NO <sub>3</sub> <sup>-</sup> limitation | replete              | 1013                                           | 1216                                              | 320         | 4          | 428         | 752                                            | 62%                    | 464                                                     | 0.8%                                  |
|                                         | mid-exponential lim  | 1013                                           | 1216                                              | 320         | 4          | 428         | 752                                            | 62%                    | 464                                                     | 1.7%                                  |
|                                         | late-exponential lim | 1013                                           | 1216                                              | 320         | 4          | 428         | 752                                            | 62%                    | 464                                                     | 2.7%                                  |

82  
83  
84  
85  
86  
87  
88  
89  
90  
91  
92  
93  
94  
95

96 Supporting Information Figures

97 Fig. S1: Thermal response curve of growth rate ( $\mu$ ).  $\mu$  was calculated with cell concentrations  
98 and  $\mu_{in-vivo}$  was calculated with in-vivo fluorescence for *E. huxleyi* (a) and *T. oceanica* (b). Error  
99 bars represent  $\pm$  SD.

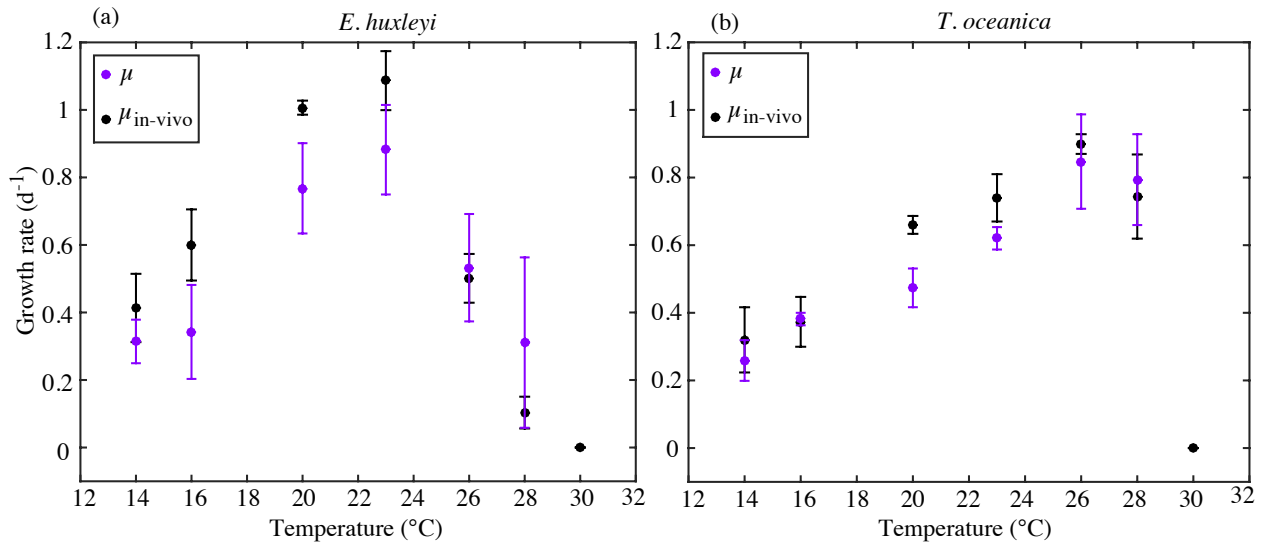

100  
101  
102  
103  
104  
105  
106  
107  
108  
109  
110  
111  
112  
113  
114  
115  
116  
117

118 Fig. S2:  $F_v/F_m$  measured in *E. huxleyi* and *T. oceanica* under steady-state temperature stress (a,b),  
119  $\text{NO}_3^-$  limitation (c,d) and salinity stress (e,f). Error bars represent  $\pm$  SD.

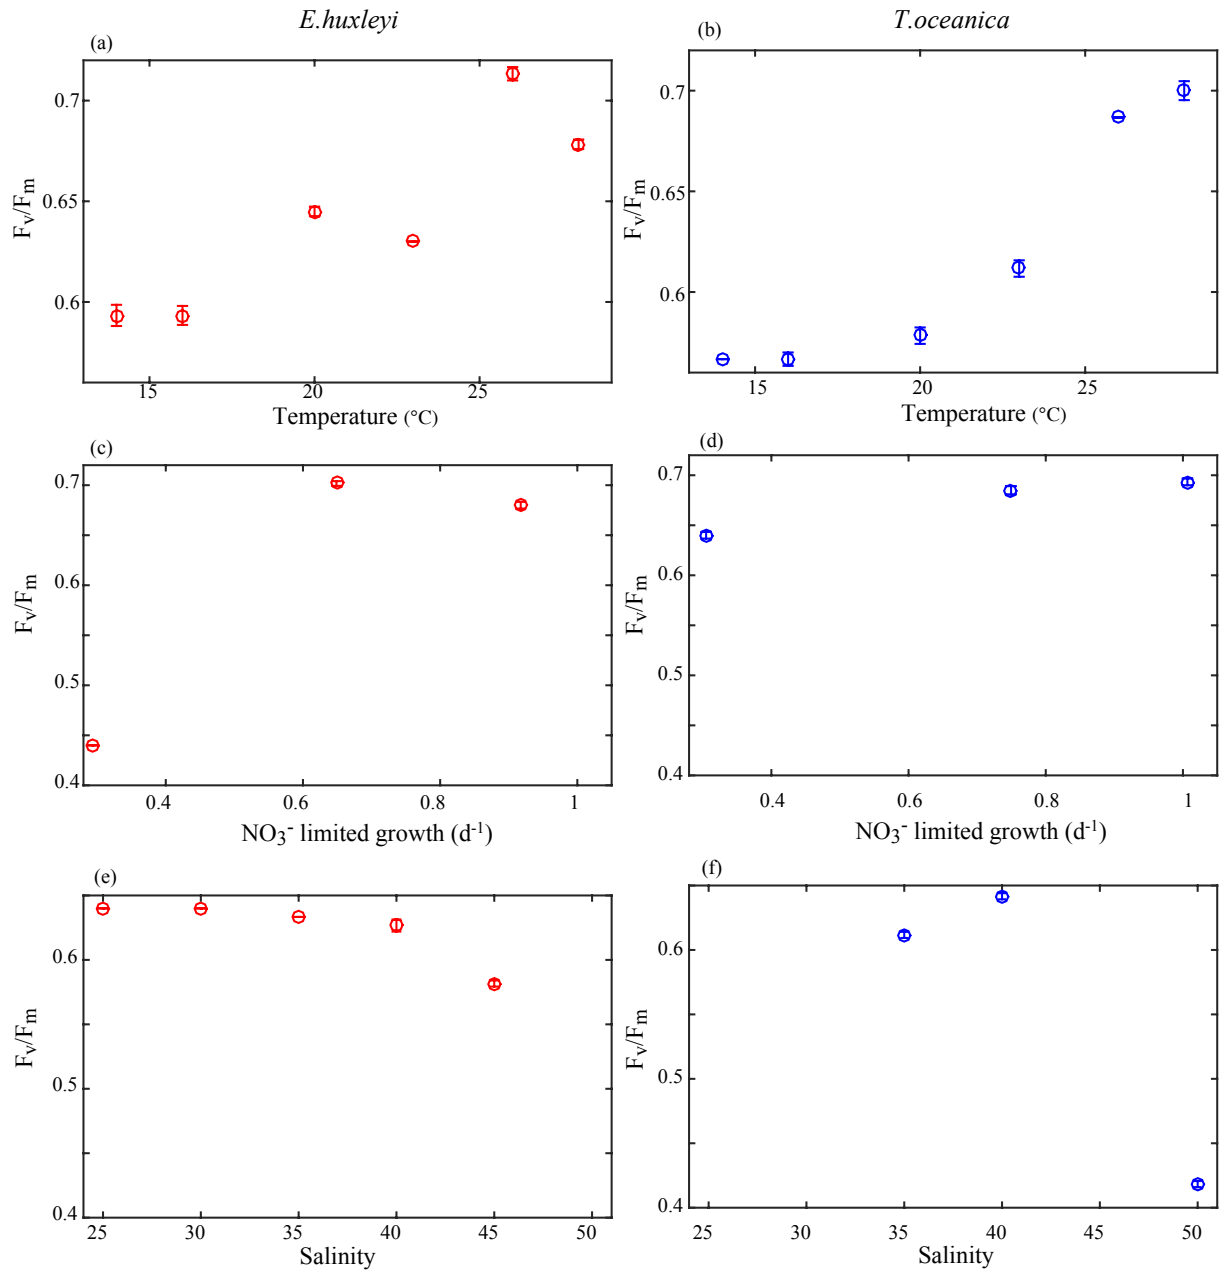

121 Fig. S3: Intracellular DMSP measured in *E. huxleyi* and *T. oceanica* under steady-state  
122 temperature stress (a,b),  $\text{NO}_3^-$  limitation (c,d) and salinity stress (e,f). Error bars represent  $\pm$  SD.

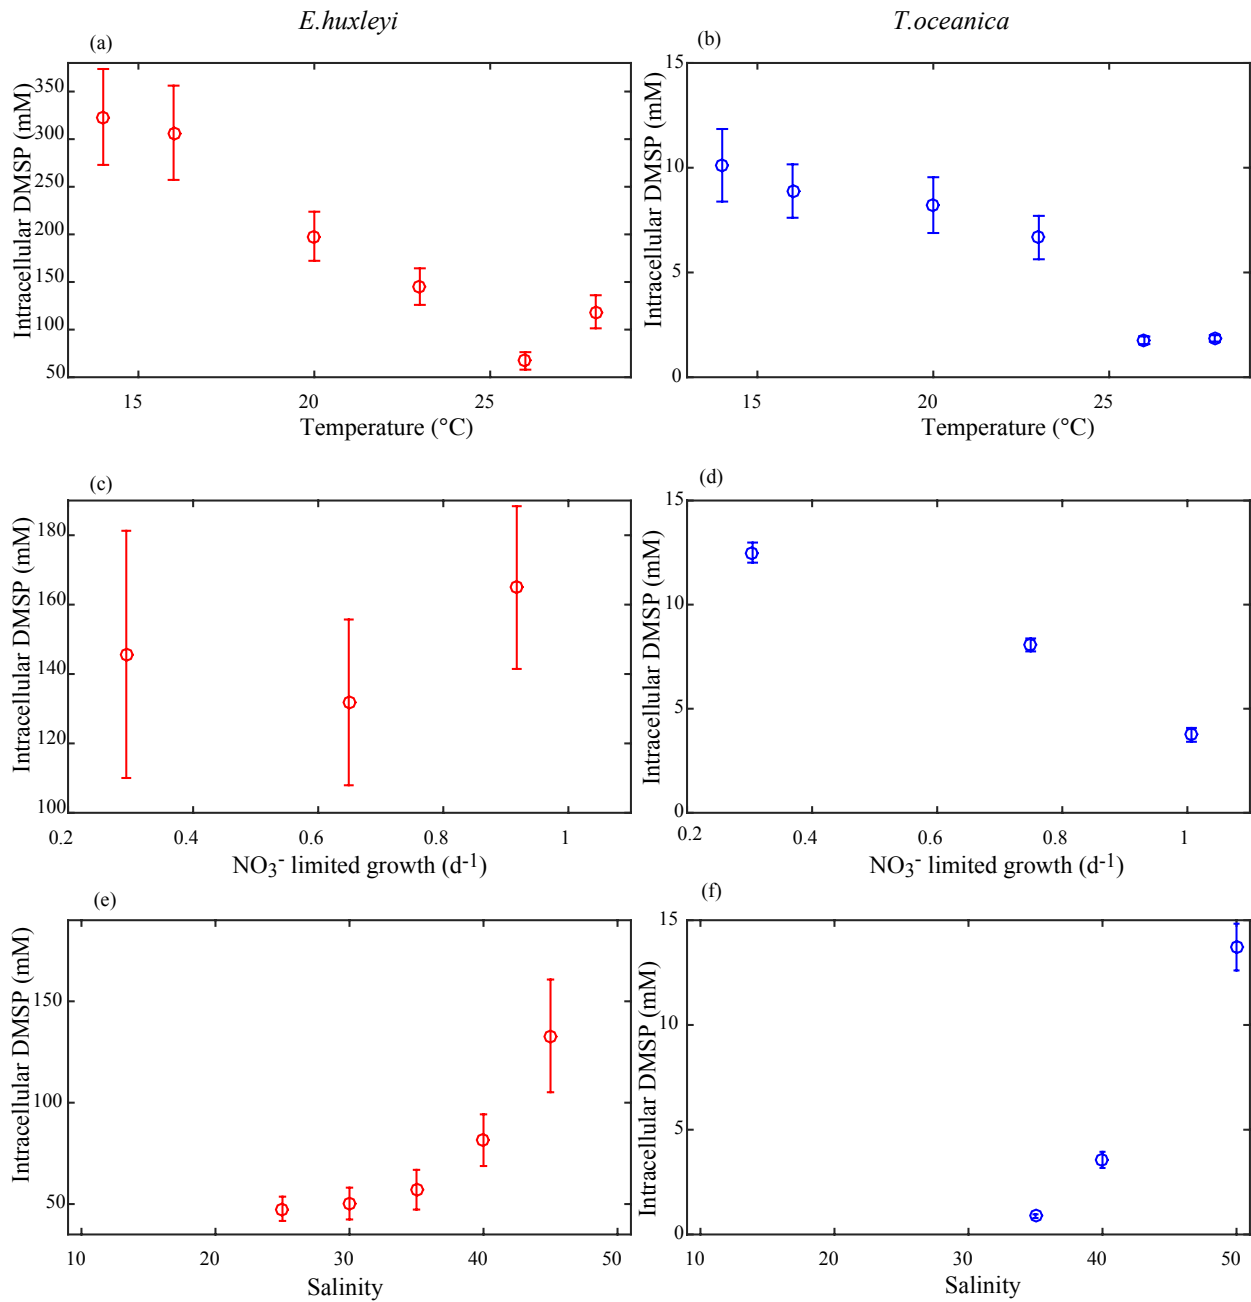

124 Fig. S4:  $F_v/F_m$  measured in exponential cultures of *T. oceanica* grown at different steady-state  
 125 concentrations of  $\text{NO}_3^-$ . Error bars represent  $\pm$  SD.

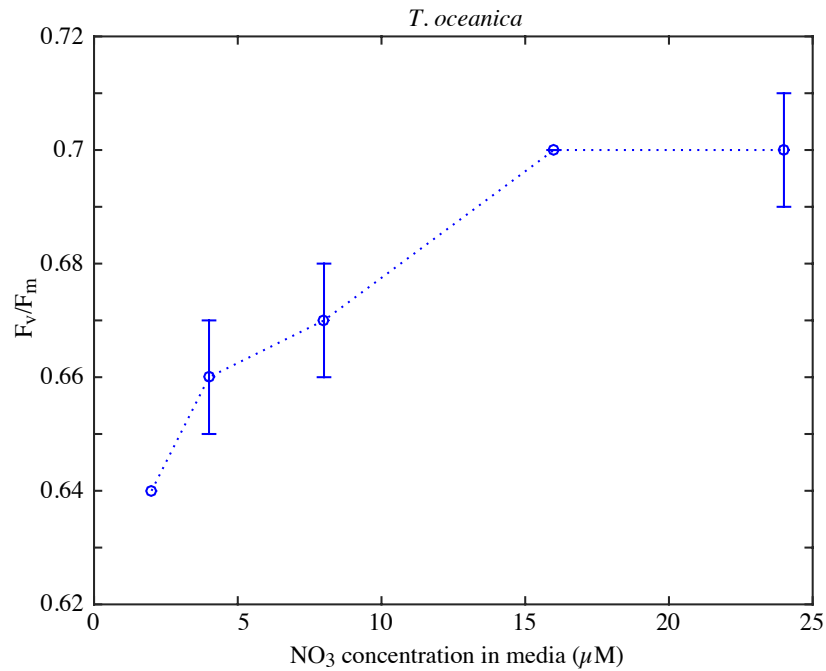

126

127

128 Fig. S5:  $F_v/F_m$  diel cycle for *E. huxleyi* (a) and *T. oceanica* (b) in steady-state  $\text{NO}_3^-$  replete (solid  
 129 black line) and  $\text{NO}_3^-$  limited (dashed line) conditions and non-steady-state  $\text{NO}_3^-$  add-back (solid  
 130 red or blue line). Light cycle (14:10 light:dark) begins at 06:00 h. Experiments began at 07:00 h.  
 131 Error bars represent  $\pm$  SD.

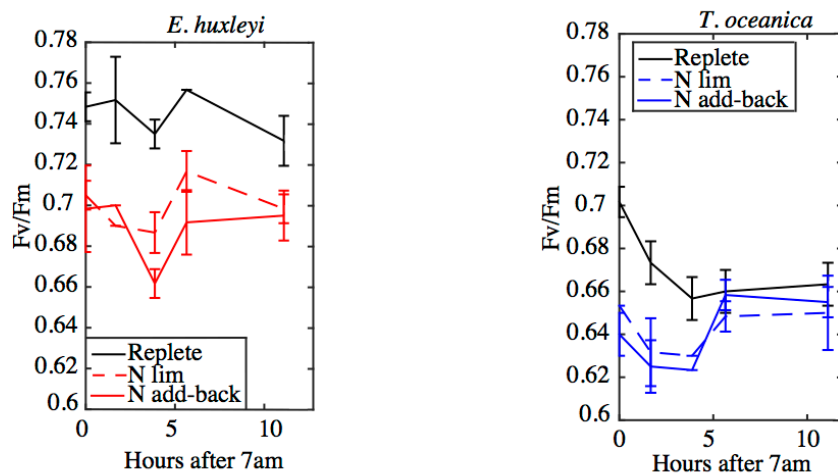

132

133

134



135 Fig. S6: DMSPt after  $\text{NO}_3^-$  add-back for *E. huxleyi* (a) and *T. oceanica* (b). Solid lines indicate  
 136 the  $\text{NO}_3^-$  add-back treatment (+N). The dashed lines represent the control treatment (-N). Grey  
 137 shading indicates the dark period (14:10 light:dark cycle). Error bars represent  $\pm$  SD.

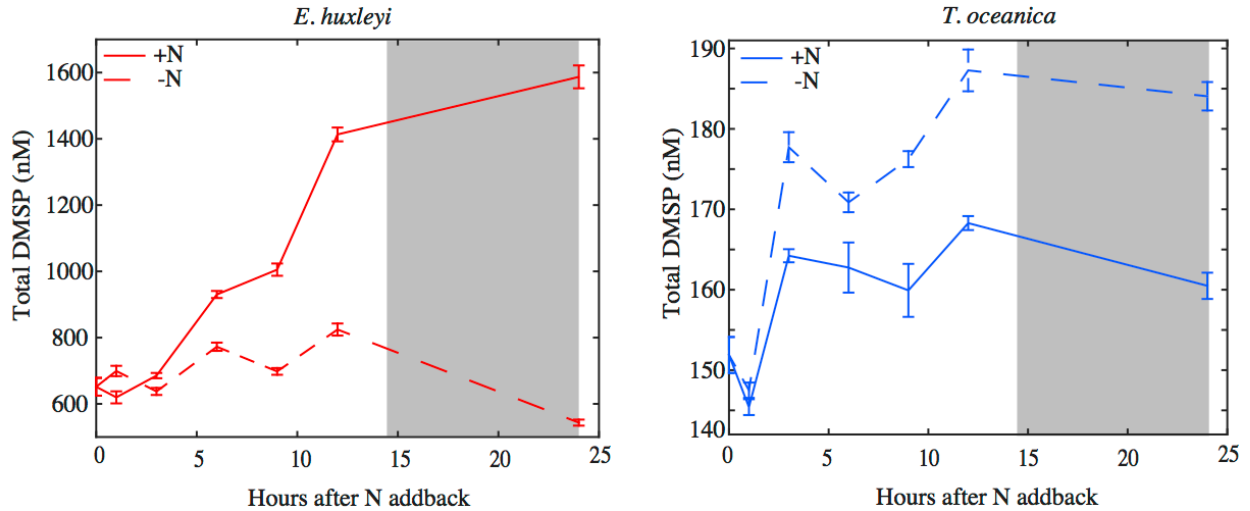

138  
 139 Fig. S7: Dilution of intracellular DMSP in *T. oceanica* by cell division. Blue line represents the  
 140 observed intracellular DMSP (main text, Fig. 5b). Black line represents intracellular DMSP  
 141 calculated by holding DMSPt concentration at 0 h constant and dividing by the observed changes  
 142 in biomass and biovolume. The almost identical results suggest that the rapid decrease after  $\text{NO}_3^-$   
 143 add-back can be primarily attributed to dilution of intracellular DMSP by cell division. Error  
 144 bars represent  $\pm$  SD.

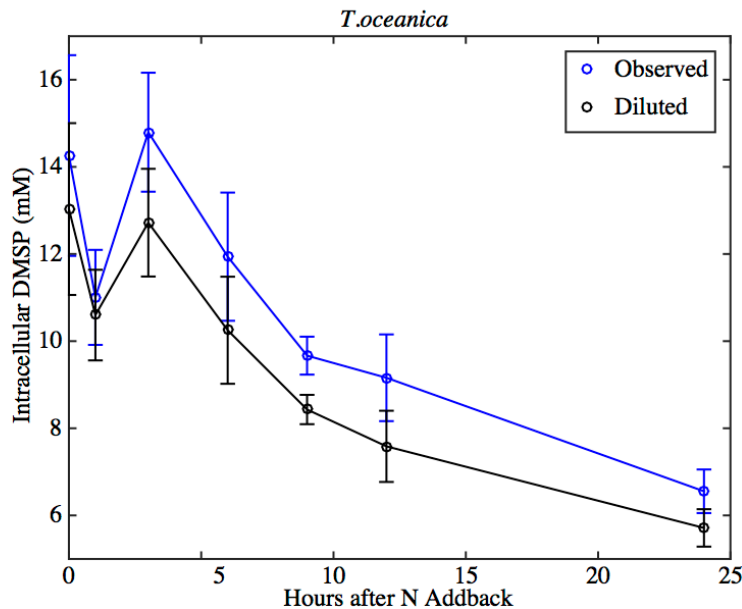

146 Supplementary References

147 Mackey, K. R. M., A. Paytan, A. R. Grossman, and S. Bailey. 2008. A photosynthetic strategy  
148 for coping in a high-light, low-nutrient environment. *Limnol. Oceanogr.* **53**: 900–913.  
149 doi:10.4319/lo.2008.53.3.0900

150 Villareal, T. A. 2004. Single-cell pulse amplitude modulation fluorescence measurements of the  
151 giant diatom *Ethmodiscus* (Bacillariophyceae). *J. Phycol.* **40**: 1052–1061.  
152 doi:10.1111/j.1529-8817.2004.03208.x

153
